# Supplementary material for: Does the presence of lignin affect the pyrolytic decomposition of cellulose? A condensed phase computational investigation
Source: Royal Society of Chemistry journal article supplement (doi:10.1039/d3se00379e), 2023-01-01
Supplement: d3se00379e1.pdf [file d3se00379e1.pdf]

## Does the presence of lignin affect the pyrolytic decomposition of cellulose? A condensed phase computational investigation

Arul Mozhi Devan Padmanathan<sup>a</sup>, Rahul Vaidya<sup>a</sup> and Samir H Mushrif<sup>a\*</sup>

\*Email: [mushrif@ualberta.ca](mailto:mushrif@ualberta.ca)

<sup>a</sup>Department of Chemical and Materials Engineering, University of Alberta, 9211-116 Street Northwest, Edmonton, Alberta T6G 1H9, Canada.

### Supporting Information

#### Content

*Table S1. Studies that do not show any significant interactions between the biomass components during pyrolysis*

*Table S2. Studies that show interactions between the biomass components during pyrolysis*

*Figure S1: DFT calculated structures of (A) Cellobiose molecule and transition states in gas phase for (B) Transglycosylation (C) Ring contraction mechanisms.*

*Figure S2: DFT calculated structures of (A) Quinone methide intermediate (lignin dimer) (B) Lignin-Carbohydrate complex (LCC) molecule.*

Molecule Coordinates

Non-bonded Parameters using in MD simulations

## Literature review

Table S1: Studies that do not show any significant interactions between the biomass components during pyrolysis.

| Title                                                                                                                                                       | Authors           | Year | Equipment       | Temperature                 | Feed                                              | Interactions between biomass components                                                                                                   |
|-------------------------------------------------------------------------------------------------------------------------------------------------------------|-------------------|------|-----------------|-----------------------------|---------------------------------------------------|-------------------------------------------------------------------------------------------------------------------------------------------|
| Pyrolysis characteristics of biomass and biomass components                                                                                                 | Raveendran et al. | 1995 | TG/Packed bed   | 1000°C (50°C/min)           | 14 native biomass & synthetic                     | No interactions. Char, liquid and gas yields match additive model.                                                                        |
| Kinetics of Biomass Pyrolysis: a Reformulated Three-Parallel-Reactions Model                                                                                | Manya et al.      | 2003 | TG              | 900°C (20°C/min)            | Sugarcane bagasse/waste wood (washed & untreated) | No interactions. Weight loss predicts match additive model.                                                                               |
| Further Applications of a Revisited Summative Model for Kinetics of Biomass Pyrolysis                                                                       | Gomez et al.      | 2004 | TG              | 900°C (20°C/min)            | pine, beech, thistle (washed & untreated)         | No interactions. Weight loss predicts match additive model.                                                                               |
| In-Depth Investigation of Biomass Pyrolysis Based on Three Major Components: Hemicellulose, Cellulose and Lignin                                            | Yang et al.       | 2005 | TG              | 105°C-900°C (10°C/min)      | Synthetic mixture & Palm oil waste                | No interactions. Biomass compents were predicted from weight loss measurements by additive model.                                         |
| TG study on pyrolysis of biomass and its three components under syngas                                                                                      | Wang et al.       | 2007 | TG              | 300°C-600° C (max 20°C/min) | sawdust                                           | No interactions. Weight loss predicted by additive model. Lumped activation energy for native biomass within the range of its components. |
| TGA and macro-TGA characterisation of biomass fuels and fuel mixtures                                                                                       | Skreiberg et al.  | 2010 | TG and macro-TG | 60°C-900°C (max 100°C/min)  | Wood, coffe waste, demolition wood and mixtures   | No interactions. Combustion characteristics and gas yields showed qualitative additive behaviour.                                         |
| Experimental Study of Biomass Pyrolysis Based on Three Major Components: Hemicellulose, Cellulose, and Lignin                                               | Qu et al.         | 2011 | Tube furnace    | 350°C-600° C                | rice straw, corn stalk, peanut vine               | No interactions. Char, gas and bio-oil yield trends are predicted by additive model.                                                      |
| Thermogravimetric Pyrolysis and Gasification of Lignocellulosic Biomass and Kinetic Summative Law for Parallel Reactions with Cellulose, Xylan, and Lignin, | Yoon et al.       | 2012 | TG-GC           | 140°C-900°C (10°C/min)      | Conifers & synthetic                              | No interactions. Total gas yields and carbon conversion predicted by additive model.                                                      |
| Relationship between thermal behaviour of lignocellulosic components and properties of biomass                                                              | Pang et al.       | 2014 | TG              | 900°C (10°C/min)            | 11 native biomass & Synthetic                     | No interactions. Peak decomposition temperature and weight loss predicted by additive model.                                              |

Table S2: Studies that show interactions between the biomass components during pyrolysis.

| Title                                                                                                                                                      | Authors         | Year | Equipment                           | Temperature                    | Feed                                                                             | Interactions between biomass components                                                                                                                                          |
|------------------------------------------------------------------------------------------------------------------------------------------------------------|-----------------|------|-------------------------------------|--------------------------------|----------------------------------------------------------------------------------|----------------------------------------------------------------------------------------------------------------------------------------------------------------------------------|
| Influence of inorganic matter on wood pyrolysis at gasification temperature                                                                                | Hosoya et al.   | 2007 | Glass tubular surface               | 800°C                          | Cedar (washed & untreated)                                                       | Yes. Hydrolysable sugar (yield and MW) affected.                                                                                                                                 |
| The influence of temperature on the yields of compounds existing in bio-oils obtained from biomass samples via pyrolysis                                   | Demirbas et al. | 2007 | Electrically heated tubular furnace | 352°C-552°C (10°C/s)           | Olive husk, hazelnut shells, spruce and beech wood                               | Yes. Drastic change in LGA product yields.                                                                                                                                       |
| Solid/liquid- and vapor-phase interactions between cellulose and lignin-derived pyrolysis products                                                         | Hosoya et al.   | 2009 | Ampoule reactor                     | 600°C                          | Synthetic                                                                        | Yes. Change in tar, water and char yields.                                                                                                                                       |
| Influence of the interaction of components on the pyrolysis behavior of biomass,                                                                           | Wang et al.     | 2011 | TG-FTIR                             | 300°C-800°C                    | Synthetic                                                                        | Yes. Extended LGA formation temperature range, 2-furfural and acetic acid yields change.                                                                                         |
| Is it possible to predict gas yields of any biomass after rapid pyrolysis at high temperature from its composition in cellulose, hemicellulose and lignin? | Couhert et al.  | 2011 | Electrically heated flow reactor    | 950°C                          | Synthetic & native (beech, spruce, ricehusk, wood bark, grass)                   | Yes. Gas (CO, CO <sub>2</sub> , CH <sub>4</sub> , H <sub>2</sub> , C <sub>2</sub> H <sub>2</sub> , C <sub>2</sub> H <sub>4</sub> ) yields cannot be predicted by additive model. |
| Pyrolytic Reactions of Lignin within Naturally Occurring Plant Matrices: Challenges in Biomass Pyrolysis Modeling Due to Synergistic Effects               | George et al.   | 2014 | Wire mesh pyrolysis                 | 400°C-900°C (1°C/s & 1000°C/s) | Synthetic & native (silver birchwood, sugarcane baggase)                         | Yes. Char yields are altered.                                                                                                                                                    |
| Cellulose-Lignin interactions during slow and fast pyrolysis                                                                                               | Hilbers et al.  | 2015 | TGA/Py-GC-MS                        | 350°C & 500°C                  | Synthetic                                                                        | Yes. Enhanced LGA and reduced dehydration reactions.                                                                                                                             |
| Cellulose-Hemicellulose and Cellulose-Lignin Interactions during Fast Pyrolysis                                                                            | Zhang et al.    | 2015 | Py-GC-MS                            | 500°C                          | Synthetic & native [Cornstover, pine, red oak, switchgrass (washed + untreated)] | Yes, interctions in herbaceous cellulose-lignin samples. No interactions between synthetic, native cellulose-hemicellulose and woody cellulose-lignin samples.                   |
| Cellulose-lignin interactions during fast pyrolysis with different temperatures and mixing methods                                                         | Wu et al.       | 2016 | Py-GC-MS                            | 500°C, 600°C & 700°C           | Synthetic and native pretreated                                                  | Yes, LGA yield promoted while C1-C3 products are inhibited.                                                                                                                      |
| Cellulose, xylan and lignin interactions during pyrolysis of lignocellulosic biomass,                                                                      | Yu et al.       | 2017 | Wire mesh reactor                   | 50° C to 900° C(30° C/min)     | Spruce, oak, pine                                                                | Yes, at high temperatures additive model cannot predict tar, char and other product yields. However at 325°C, no interactions.                                                   |
| Effects of cellulose, hemicellulose and lignin on biomass pyrolysis kinetics                                                                               | Zhu et al.      | 2020 | TGA                                 | 800° C(10° C/min)              | Synthetic                                                                        | Yes, change in decomposition temperature and other kinetic parameters.                                                                                                           |

## Molecule and system visualizations

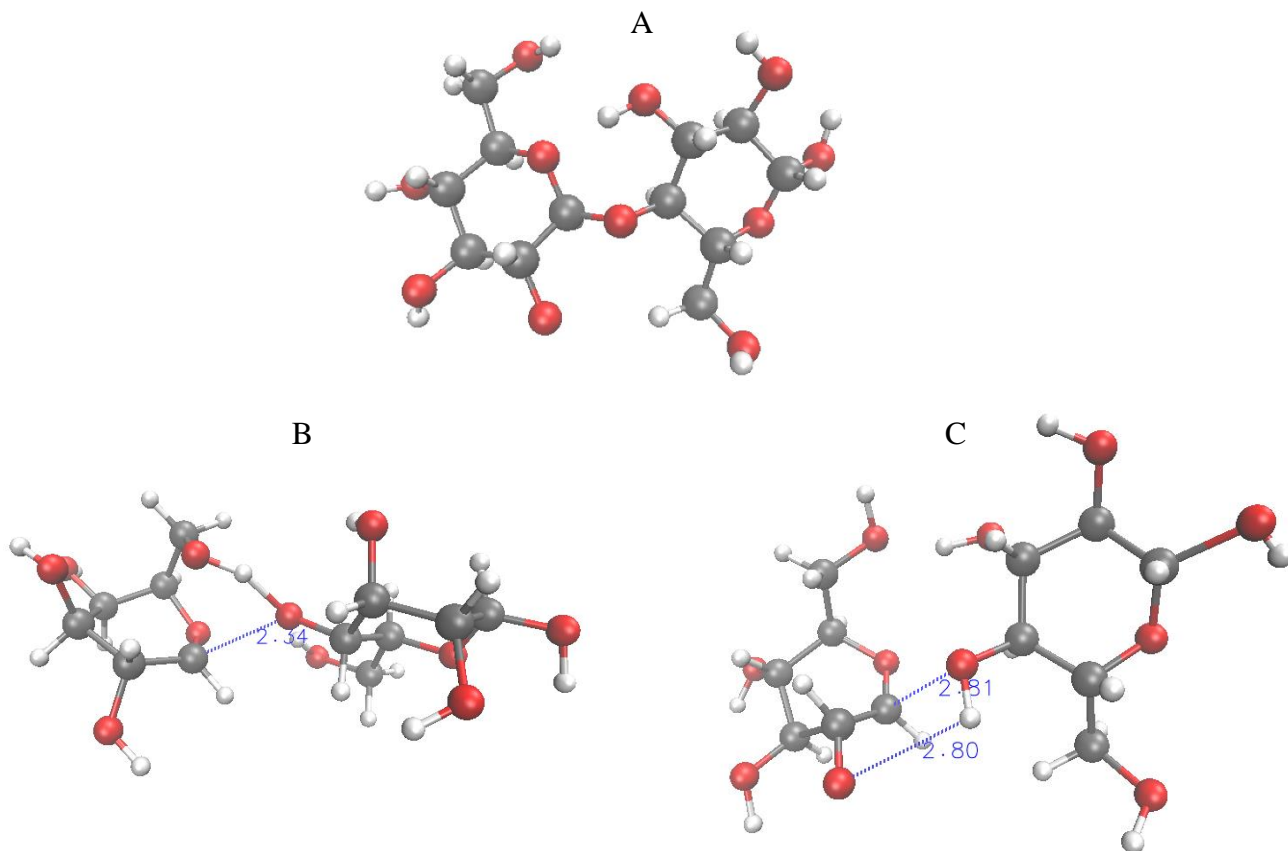

Figure S1: DFT calculated structures of (A) Cellobiose molecule and transition states in gas phase for (B) Transglycosylation (C) Ring contraction mechanisms.

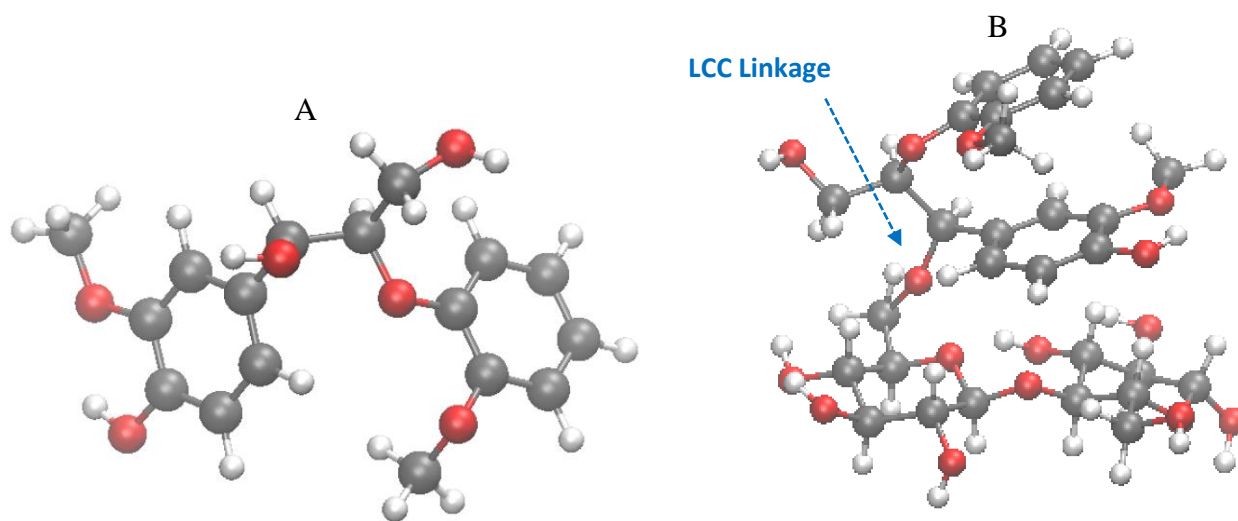

Figure S2: DFT calculated structures of (A) Quinone methide intermediate (lignin dimer) (B) Lignin-Carbohydrate complex (LCC) molecule.

## Molecule Coordinates

### Cellulose

|   |       |       |       |
|---|-------|-------|-------|
| C | 14.95 | 10.4  | 14.25 |
| C | 19.06 | 13.32 | 15.52 |
| C | 19.47 | 14.69 | 14.99 |
| C | 21    | 14.81 | 15.02 |
| C | 16.38 | 9.86  | 14.09 |
| C | 16.5  | 8.33  | 14.23 |
| C | 17.97 | 7.87  | 14.07 |
| C | 18.89 | 8.73  | 14.94 |
| C | 18.65 | 10.21 | 14.6  |
| C | 22.25 | 11.5  | 14.13 |
| C | 21.36 | 12.52 | 14.85 |
| C | 19.84 | 12.24 | 14.75 |
| H | 19.26 | 13.23 | 16.59 |
| H | 14.54 | 10.15 | 15.22 |
| H | 19.08 | 14.84 | 13.98 |
| H | 14.29 | 9.96  | 13.51 |
| H | 21.37 | 14.82 | 16.05 |
| H | 16.65 | 10.07 | 13.08 |
| H | 16.11 | 8.02  | 15.19 |
| H | 18.26 | 7.96  | 13.02 |
| H | 18.66 | 8.57  | 15.99 |
| H | 18.83 | 10.33 | 13.52 |
| H | 21.88 | 10.49 | 14.29 |
| H | 22.27 | 11.68 | 13.06 |
| H | 21.65 | 12.55 | 15.89 |
| H | 19.59 | 12.3  | 13.69 |
| H | 15.38 | 6.91  | 13.5  |
| H | 20.67 | 16.64 | 14.85 |
| H | 18.48 | 6.03  | 13.79 |
| H | 15.29 | 12.23 | 14.87 |
| H | 20.43 | 8.4   | 13.75 |
| H | 17.52 | 12.19 | 15.35 |
| H | 23.54 | 11.17 | 15.53 |
| H | 18.11 | 15.51 | 16.12 |
| O | 15.75 | 7.74  | 13.19 |
| O | 21.6  | 13.8  | 14.3  |
| O | 21.26 | 16    | 14.43 |
| O | 18.07 | 6.53  | 14.5  |
| O | 14.94 | 11.81 | 14.09 |

|   |       |       |       |
|---|-------|-------|-------|
| O | 20.26 | 8.39  | 14.69 |
| O | 17.33 | 10.52 | 14.94 |
| O | 19.55 | 10.98 | 15.33 |
| O | 17.68 | 13.13 | 15.26 |
| O | 23.56 | 11.57 | 14.67 |
| O | 19.02 | 15.71 | 15.86 |

Transition state -Transglycosylation mechanism

|   |       |       |       |
|---|-------|-------|-------|
| C | 19.91 | 13.16 | 15.78 |
| C | 21.01 | 14.04 | 15.18 |
| C | 20.44 | 15.44 | 14.92 |
| C | 17.03 | 9.89  | 16.19 |
| C | 16.7  | 9.73  | 14.68 |
| C | 16.56 | 8.28  | 14.15 |
| C | 17.94 | 7.6   | 13.91 |
| C | 18.92 | 8.52  | 13.17 |
| C | 18.84 | 9.92  | 13.7  |
| C | 17.2  | 14.81 | 13.48 |
| C | 18.29 | 14.67 | 14.55 |
| C | 18.63 | 13.22 | 14.94 |
| H | 20.26 | 12.13 | 15.83 |
| H | 21.89 | 14.06 | 15.83 |
| H | 16.29 | 10.54 | 16.66 |
| H | 20.11 | 15.9  | 15.86 |
| H | 16.98 | 8.93  | 16.69 |
| H | 15.72 | 10.19 | 14.56 |
| H | 16.04 | 8.31  | 13.19 |
| H | 17.84 | 6.7   | 13.31 |
| H | 19.93 | 8.18  | 13.34 |
| H | 19.65 | 10.25 | 14.35 |
| H | 16.87 | 15.84 | 13.41 |
| H | 17.62 | 14.56 | 12.5  |
| H | 18.04 | 15.18 | 15.47 |
| H | 18.78 | 12.65 | 14.02 |
| H | 21.09 | 17.14 | 14.52 |
| H | 14.85 | 7.64  | 15.04 |
| H | 17.56 | 6.99  | 15.66 |
| H | 17.86 | 11.26 | 15.89 |
| H | 17.81 | 9     | 11.64 |
| H | 18.85 | 13.22 | 17.4  |
| H | 16.02 | 13.83 | 14.67 |
| H | 20.73 | 13.98 | 13.31 |
| O | 19.41 | 15.32 | 14    |
| O | 21.39 | 16.24 | 14.39 |

|   |       |       |       |
|---|-------|-------|-------|
| O | 15.81 | 7.46  | 15.05 |
| O | 18.4  | 7.21  | 15.19 |
| O | 18.3  | 10.46 | 16.45 |
| O | 18.64 | 8.54  | 11.78 |
| O | 17.59 | 10.47 | 13.85 |
| O | 17.58 | 12.65 | 15.71 |
| O | 19.62 | 13.68 | 17.07 |
| O | 16.1  | 13.96 | 13.72 |
| O | 21.36 | 13.57 | 13.9  |

Transition state – Ring contraction mechanism

|   |       |       |       |
|---|-------|-------|-------|
| C | 18.35 | 13.48 | 17.76 |
| C | 17.14 | 13.09 | 16.87 |
| C | 17.47 | 13.28 | 15.37 |
| C | 18.79 | 12.44 | 12.46 |
| C | 19.16 | 10.98 | 12.9  |
| C | 18.11 | 10.09 | 13.65 |
| C | 17.95 | 8.73  | 13    |
| C | 21.23 | 9.62  | 15.28 |
| C | 21.13 | 10.21 | 13.97 |
| C | 20.51 | 15.27 | 15.74 |
| C | 19.71 | 13.97 | 15.66 |
| C | 19.64 | 13.18 | 16.99 |
| H | 18.38 | 12.91 | 18.69 |
| H | 16.88 | 12.04 | 17.03 |
| H | 19.48 | 12.8  | 11.71 |
| H | 17.92 | 12.35 | 15.04 |
| H | 19    | 13.14 | 13.24 |
| H | 19.5  | 10.43 | 12.02 |
| H | 18.41 | 9.94  | 14.7  |
| H | 17.33 | 8.64  | 12.12 |
| H | 21.95 | 8.8   | 15.31 |
| H | 21.97 | 10.12 | 13.3  |
| H | 20.46 | 15.79 | 14.79 |
| H | 20.05 | 15.94 | 16.47 |
| H | 20.23 | 13.36 | 14.93 |
| H | 20.49 | 13.45 | 17.61 |
| H | 15.64 | 13.73 | 15.18 |
| H | 16.82 | 11.39 | 13.13 |
| H | 17.53 | 7.15  | 13.95 |
| H | 17.07 | 13.23 | 12.82 |
| H | 20.45 | 11.34 | 16.38 |
| H | 17.69 | 15.22 | 17.4  |
| H | 21.91 | 14.52 | 16.87 |

|   |       |       |       |
|---|-------|-------|-------|
| H | 16    | 13.98 | 18.14 |
| O | 18.39 | 14.32 | 15.21 |
| O | 16.36 | 13.49 | 14.59 |
| O | 16.81 | 10.61 | 13.66 |
| O | 18.34 | 7.6   | 13.66 |
| O | 17.44 | 12.71 | 12.1  |
| O | 20.6  | 9.97  | 16.28 |
| O | 20.28 | 11.25 | 13.74 |
| O | 19.61 | 11.76 | 16.79 |
| O | 18.28 | 14.86 | 18.06 |
| O | 21.87 | 15.03 | 16.07 |
| O | 16.04 | 13.91 | 17.18 |

Quinone Methide intermediate (Lignin dimer)

|   |       |       |       |
|---|-------|-------|-------|
| C | 16.19 | 15.02 | 16.99 |
| C | 16.22 | 17.14 | 16.07 |
| C | 16.5  | 17.32 | 14.7  |
| C | 17.36 | 18.39 | 14.32 |
| C | 17.87 | 19.28 | 15.29 |
| C | 17.55 | 19.11 | 16.65 |
| C | 16.73 | 18.04 | 17.04 |
| C | 16.14 | 16.55 | 12.4  |
| C | 15.14 | 17.57 | 11.83 |
| C | 15.92 | 15.17 | 11.73 |
| C | 16.74 | 14    | 12.27 |
| C | 17.72 | 13.38 | 11.46 |
| C | 18.44 | 12.27 | 11.94 |
| C | 19.54 | 11.89 | 9.85  |
| C | 18.19 | 11.8  | 13.24 |
| C | 17.22 | 12.4  | 14.05 |
| C | 16.49 | 13.5  | 13.56 |
| H | 16.74 | 15.3  | 17.89 |
| H | 16.92 | 14.66 | 16.26 |
| H | 15.54 | 14.19 | 17.24 |
| H | 17.64 | 18.56 | 13.3  |
| H | 18.5  | 20.1  | 14.99 |
| H | 17.95 | 19.8  | 17.38 |
| H | 16.49 | 17.89 | 18.08 |
| H | 17.17 | 16.81 | 12.17 |
| H | 14.17 | 17.46 | 12.31 |
| H | 14.97 | 17.35 | 10.77 |
| H | 14.96 | 19.4  | 12.44 |
| H | 16.19 | 15.28 | 10.68 |
| H | 14.46 | 14.02 | 11.19 |



|   |       |       |       |
|---|-------|-------|-------|
| H | 17.88 | 13.76 | 10.46 |
| H | 18.6  | 11.79 | 9.3   |
| H | 20.25 | 11.2  | 9.39  |
| H | 19.93 | 12.9  | 9.7   |
| H | 19.51 | 10.52 | 12.96 |
| H | 17.01 | 12.01 | 15.04 |
| H | 15.72 | 13.95 | 14.17 |
| O | 15.43 | 16.1  | 16.48 |
| O | 15.93 | 16.42 | 13.82 |
| O | 15.58 | 18.9  | 11.9  |
| O | 14.56 | 14.8  | 11.74 |
| O | 19.39 | 11.57 | 11.22 |
| O | 18.92 | 10.74 | 13.67 |

Lignin-carbohydrate complex (LCC) molecule

|   |       |      |      |
|---|-------|------|------|
| C | 16.25 | 1.32 | 2.45 |
| C | 18.27 | 2.59 | 2.9  |
| C | 19.05 | 3.27 | 3.86 |
| C | 20.22 | 3.94 | 3.47 |
| C | 20.61 | 3.97 | 2.12 |
| C | 19.84 | 3.3  | 1.15 |
| C | 18.67 | 2.61 | 1.54 |
| C | 18.65 | 4.4  | 5.93 |
| C | 19.54 | 4.23 | 7.17 |
| C | 17.18 | 4.79 | 6.24 |
| C | 16.22 | 4.55 | 5.09 |
| C | 16    | 5.56 | 4.12 |
| C | 14.98 | 5.4  | 3.15 |
| C | 15.61 | 7.37 | 1.96 |
| C | 16.66 | 4.15 | 8.98 |
| C | 13.52 | 6.26 | 6.67 |
| C | 13.14 | 7.65 | 6.14 |
| C | 12.29 | 7.54 | 4.86 |
| C | 14.31 | 3.3  | 4.21 |
| C | 15.38 | 3.42 | 5.11 |
| C | 15.27 | 3.55 | 9.21 |
| C | 15.28 | 2.01 | 9.44 |
| C | 13.89 | 1.48 | 9.26 |
| C | 13.33 | 1.92 | 7.9  |
| C | 13.28 | 3.46 | 7.92 |
| C | 10.1  | 4.74 | 5.62 |
| C | 11.43 | 5.47 | 5.46 |
| C | 12.3  | 5.32 | 6.73 |
| C | 14.14 | 4.28 | 3.22 |

|   |       |      |       |
|---|-------|------|-------|
| H | 15.65 | 2.09 | 1.98  |
| H | 15.55 | 0.71 | 3.01  |
| H | 16.72 | 0.69 | 1.7   |
| H | 20.86 | 4.42 | 4.21  |
| H | 21.52 | 4.48 | 1.84  |
| H | 20.14 | 3.31 | 0.12  |
| H | 18.12 | 2.1  | 0.78  |
| H | 19.04 | 5.23 | 5.34  |
| H | 19.3  | 3.33 | 7.72  |
| H | 19.33 | 5.03 | 7.87  |
| H | 21.36 | 3.5  | 7.27  |
| H | 17.18 | 5.87 | 6.43  |
| H | 16.62 | 6.43 | 4.15  |
| H | 15.61 | 8.05 | 2.82  |
| H | 15.31 | 7.94 | 1.08  |
| H | 16.62 | 7.01 | 1.79  |
| H | 14.26 | 5.82 | 6.02  |
| H | 17.26 | 4.13 | 9.89  |
| H | 12.59 | 8.17 | 6.91  |
| H | 17.17 | 3.59 | 8.2   |
| H | 12.83 | 7.02 | 4.06  |
| H | 13.29 | 4.91 | 1.7   |
| H | 13.64 | 2.46 | 4.28  |
| H | 15.54 | 2.67 | 5.87  |
| H | 14.79 | 4.04 | 10.05 |
| H | 16.04 | 1.64 | 8.75  |
| H | 13.23 | 1.74 | 10.09 |
| H | 13.97 | 1.6  | 7.09  |
| H | 12.71 | 3.8  | 8.79  |
| H | 9.55  | 5.14 | 6.47  |
| H | 10.31 | 3.69 | 5.82  |
| H | 11.94 | 5.03 | 4.61  |
| H | 11.68 | 5.57 | 7.6   |
| H | 15.6  | 0.85 | 10.99 |
| H | 11.38 | 8.74 | 3.7   |
| H | 15.36 | 0.14 | 9.33  |
| H | 11.53 | 1.46 | 8.51  |
| H | 14.54 | 5.58 | 8.09  |
| H | 8.6   | 4.19 | 4.56  |
| H | 13.88 | 9.01 | 5.1   |
| O | 17.17 | 1.9  | 3.36  |
| O | 18.67 | 3.19 | 5.19  |
| O | 20.9  | 4.2  | 6.79  |
| O | 16.68 | 4.24 | 7.47  |
| O | 14.7  | 6.3  | 2.15  |

|   |       |      |       |
|---|-------|------|-------|
| O | 15.69 | 1.78 | 10.79 |
| O | 11.14 | 6.85 | 5.2   |
| O | 11.98 | 8.81 | 4.43  |
| O | 13.15 | 4.17 | 2.29  |
| O | 14.38 | 0.12 | 9.27  |
| O | 12.05 | 1.36 | 7.71  |
| O | 14.6  | 3.87 | 8     |
| O | 12.68 | 3.94 | 6.76  |
| O | 14.05 | 6.41 | 7.97  |
| O | 9.3   | 4.83 | 4.45  |
| O | 14.27 | 8.39 | 5.71  |

## Non-bonded parameters

| Molecule                                                                                                              | Atom name                                                      | $\sigma$ (nm) | $\epsilon$ (kJ mol) |
|-----------------------------------------------------------------------------------------------------------------------|----------------------------------------------------------------|---------------|---------------------|
| 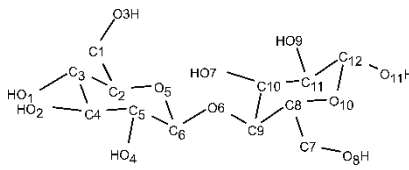 <p>Cellobiose (cellulose dimer)</p> | C1/C2/C3/C4/C5/C6/C7/C8/C9/C10/C11                             | 0.350         | 0.276               |
|                                                                                                                       | H11/H12/H21/H31/H41/H51/H61/H71/H72/<br>H81/H91/H101/H111/H121 | 0.250         | 0.126               |
|                                                                                                                       | HO2/HO3/HO4/HO6/HO7/HO8/HO9/HO11                               | 0.000         | 0.000               |
|                                                                                                                       | O2/O3/O4/O6/O7/O8/O9/O11                                       | 0.312         | 0.711               |
|                                                                                                                       | O1/O5/O10                                                      | 0.290         | 0.586               |

| Molecule                                                                                                                                   | Atom name                                                               | $\sigma$ (nm) | $\epsilon$ (kJ mol) |
|--------------------------------------------------------------------------------------------------------------------------------------------|-------------------------------------------------------------------------|---------------|---------------------|
| 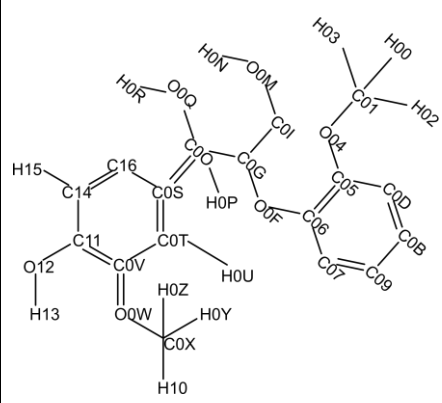 <p>Quinone Methide Intermediate<br/>(lignin dimer)</p> | C05/C06/C07/C09/C0B/C0D/C0S/C0T/C0V<br>/C11/C14/C16                     | 0.355         | 0.293               |
|                                                                                                                                            | C01/C0G/C0I/C0O/C0X                                                     | 0.350         | 0.276               |
|                                                                                                                                            | O0M/O0Q/O12                                                             | 0.312         | 0.711               |
|                                                                                                                                            | O04/O0F/O0W                                                             | 0.290         | 0.586               |
|                                                                                                                                            | H08/H0A/H0C/H0E/H0U/H15/H17/H00/H0<br>2/H03/H0H/H0J/H0K/H0P/H0Y/H0Z/H10 | 0.250         | 0.126               |
|                                                                                                                                            | H0N/H0R/H13                                                             | 0.000         | 0.000               |
